# Supplementary figures and images for: On the Microstructure and Properties of Nb-Ti-Cr-Al-B-Si-X (X = Hf, Sn, Ta) Refractory Complex Concentrated Alloys
Source: MDPI journal article supplement (doi:10.3390/ma14247615), 2021-12-10

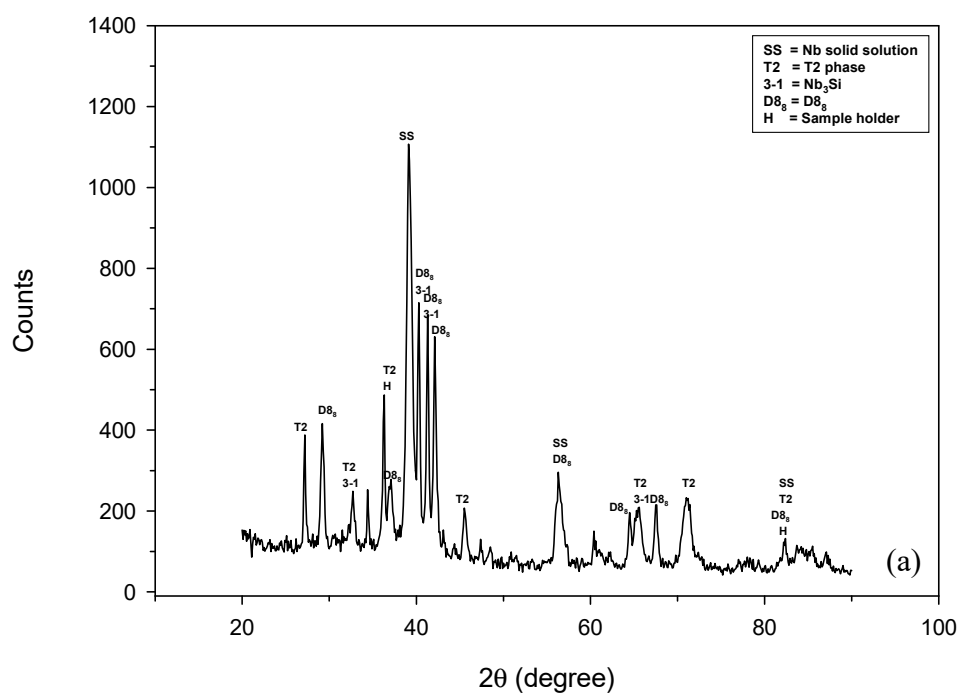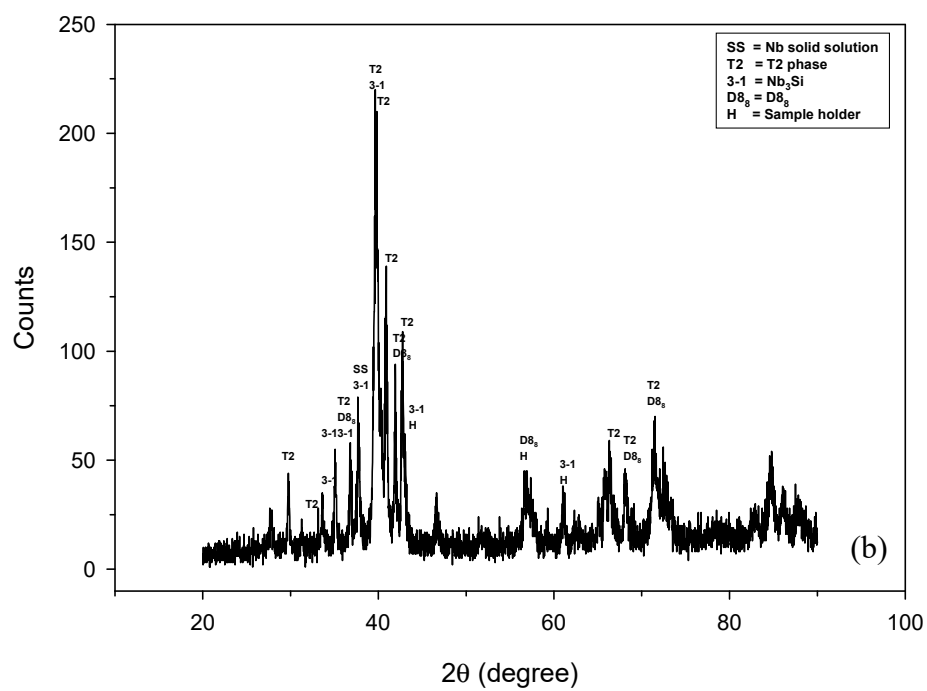

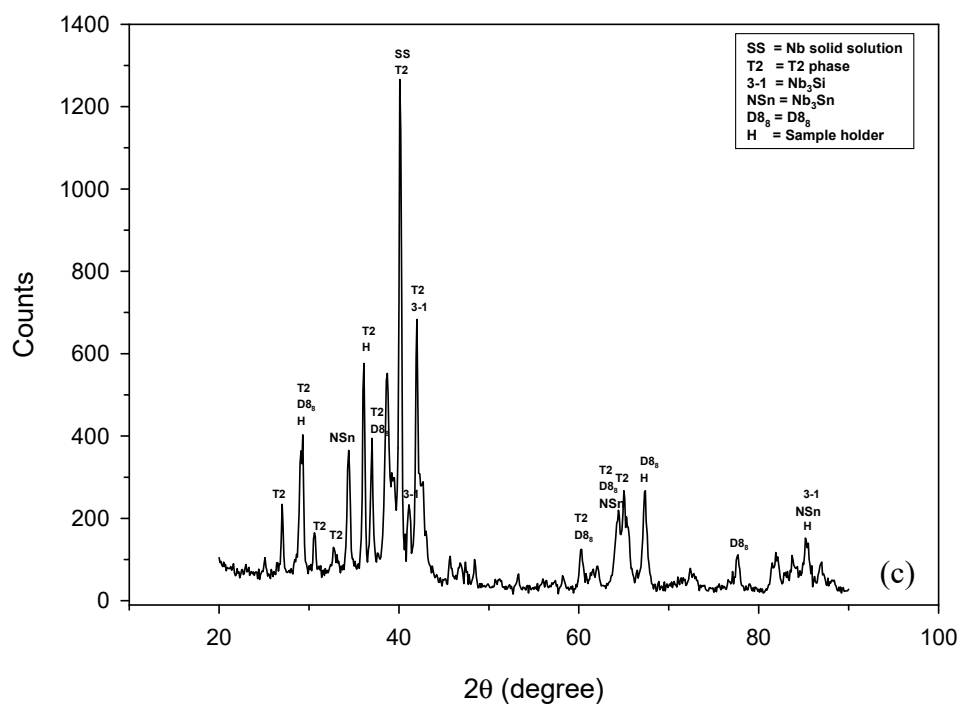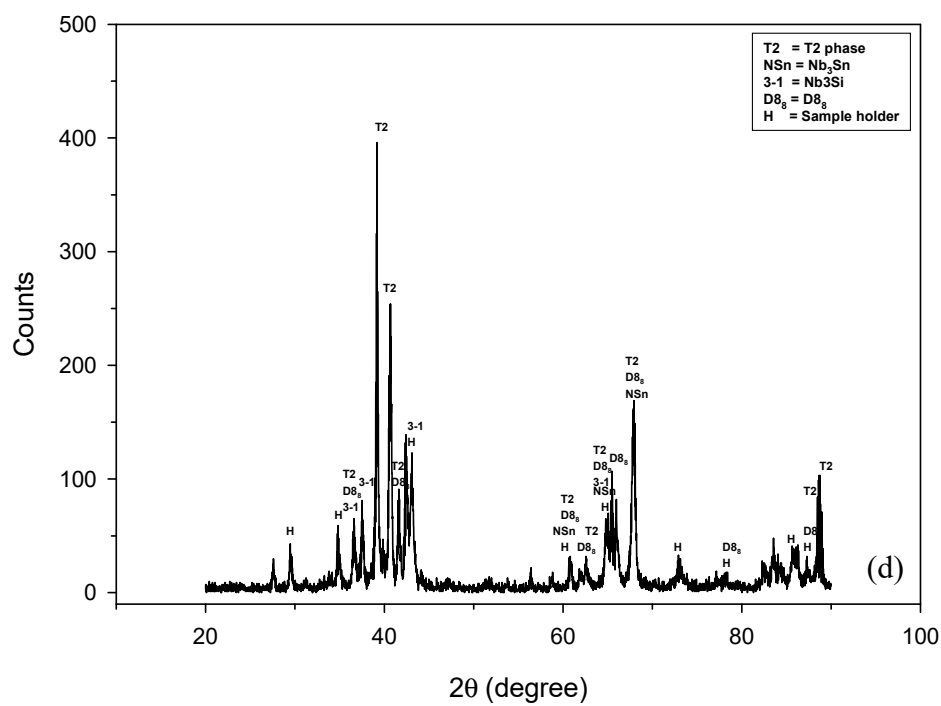

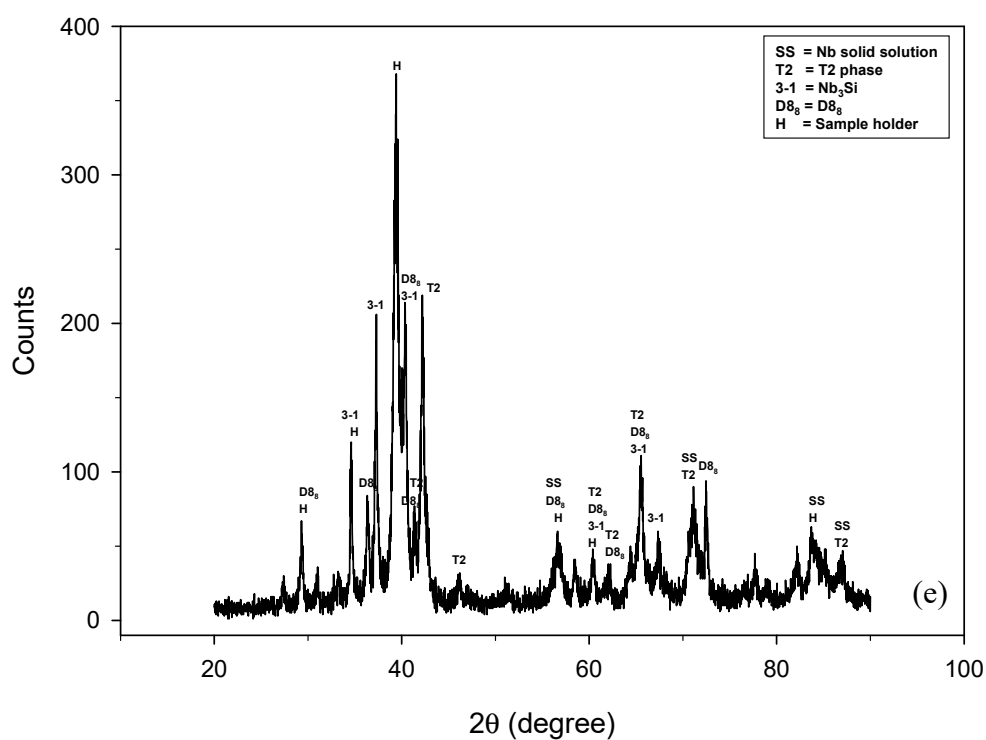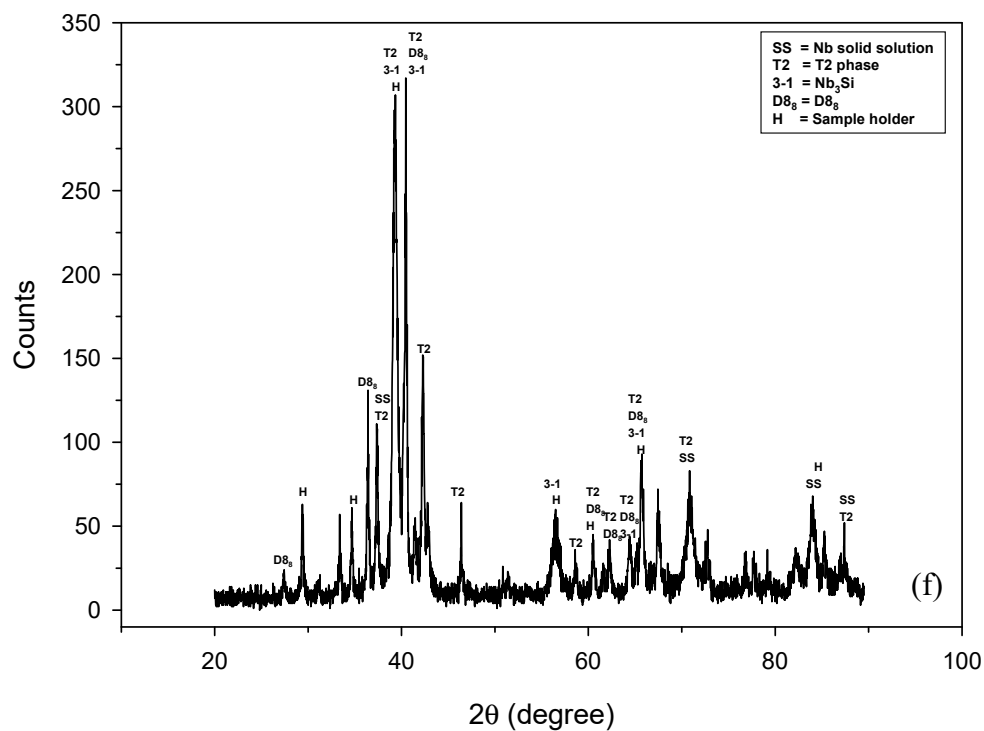

**Figure S1:** X ray diffractograms of the AC and HT alloys (a) and (b) TT5, (c) and (d) TT6 and (e) and (f) TT7.

Supplement: s1 [file s1]
